# Supplementary material for: Genome-Wide Identification of Expansin Genes in Wild Soybean (Glycine soja) and Functional Characterization of Expansin B1 (GsEXPB1) in Soybean Hair Root
Source: MDPI journal article supplement (doi:10.3390/ijms23105407), 2022-05-12
Supplement: s1 [file s1]

# Supplementary Table S1

**Table S1.** Information of wild soybean expansin super family members

| Gene name       | Gene locus   | Protein length(aa) | Intron No. | Signal peptide(aa) | pI   | Mw(kD) |
|-----------------|--------------|--------------------|------------|--------------------|------|--------|
| <i>GsEXPA1</i>  | LOC114370335 | 254                | 2          | 25                 | 9.39 | 27.7   |
| <i>GsEXPA2</i>  | LOC114372850 | 259                | 2          | 22                 | 9.58 | 28.1   |
| <i>GsEXPA3</i>  | LOC114372869 | 255                | 2          | 25                 | 7.55 | 27.4   |
| <i>GsEXPA4</i>  | LOC114374276 | 260                | 2          | 25                 | 9.57 | 28.5   |
| <i>GsEXPA5</i>  | LOC114376517 | 257                | 1          | 20                 | 9.45 | 28.0   |
| <i>GsEXPA6</i>  | LOC114379323 | 254                | 2          | 21                 | 8.26 | 28.2   |
| <i>GsEXPA7</i>  | LOC114379650 | 256                | 2          | 28                 | 9.67 | 28.6   |
| <i>GsEXPA8</i>  | LOC114380203 | 259                | 2          | 22                 | 9.60 | 28.2   |
| <i>GsEXPA9</i>  | LOC114381092 | 258                | 2          | 21                 | 9.57 | 28.1   |
| <i>GsEXPA10</i> | LOC114383211 | 266                | 1          | 25                 | 8.59 | 28.9   |
| <i>GsEXPA11</i> | LOC114383245 | 260                | 1          | 23                 | 9.50 | 28.1   |
| <i>GsEXPA12</i> | LOC114383680 | 258                | 2          | 26                 | 9.20 | 27.8   |
| <i>GsEXPA13</i> | LOC114384276 | 254                | 2          | 27                 | 7.61 | 27.3   |
| <i>GsEXPA14</i> | LOC114386648 | 250                | 2          | 20                 | 9.33 | 26.9   |
| <i>GsEXPA15</i> | LOC114387341 | 256                | 2          | 19                 | 9.43 | 27.8   |
| <i>GsEXPA16</i> | LOC114391831 | 265                | 2          | 31                 | 8.85 | 28.7   |
| <i>GsEXPA17</i> | LOC114392393 | 267                | 3          | 39                 | 8.41 | 28.8   |
| <i>GsEXPA18</i> | LOC114392564 | 255                | 2          | 23                 | 9.12 | 27.5   |
| <i>GsEXPA19</i> | LOC114394768 | 316                | 2          | None               | 9.71 | 34.3   |
| <i>GsEXPA20</i> | LOC114394777 | 255                | 1          | 26                 | 8.54 | 28.4   |
| <i>GsEXPA21</i> | LOC114395314 | 265                | 3          | None               | 9.51 | 29.1   |
| <i>GsEXPA22</i> | LOC114395314 | 241                | 2          | 19                 | 9.28 | 26.1   |
| <i>GsEXPA23</i> | LOC114395722 | 281                | 1          | 23                 | 5.52 | 30.2   |
| <i>GsEXPA24</i> | LOC114395742 | 262                | 2          | 25                 | 9.72 | 28.6   |
| <i>GsEXPA25</i> | LOC114397255 | 254                | 2          | 27                 | 8.44 | 27.2   |
| <i>GsEXPA26</i> | LOC114397606 | 258                | 2          | 21                 | 9.74 | 27.7   |
| <i>GsEXPA27</i> | LOC114397736 | 270                | 1          | 22                 | 8.09 | 29.2   |
| <i>GsEXPA28</i> | LOC114398438 | 279                | 2          | 20                 | 9.32 | 30.8   |
| <i>GsEXPA29</i> | LOC114398449 | 257                | 1          | 20                 | 9.48 | 27.6   |
| <i>GsEXPA30</i> | LOC114399108 | 250                | 3          | 25                 | 9.42 | 27.4   |
| <i>GsEXPA31</i> | LOC114399718 | 254                | 2          | 24                 | 9.80 | 27.9   |
| <i>GsEXPA32</i> | LOC114402569 | 254                | 2          | 25                 | 9.40 | 27.8   |
| <i>GsEXPA33</i> | LOC114403690 | 248                | 2          | 20                 | 9.32 | 26.6   |
| <i>GsEXPA34</i> | LOC114405974 | 249                | 2          | 24                 | 9.55 | 26.8   |
| <i>GsEXPA35</i> | LOC114407490 | 255                | 2          | 26                 | 9.55 | 27.8   |
| <i>GsEXPA36</i> | LOC114408550 | 256                | 2          | 24                 | 8.63 | 27.6   |
| <i>GsEXPA37</i> | LOC114409709 | 248                | 2          | 20                 | 8.96 | 26.7   |
| <i>GsEXPA38</i> | LOC114410169 | 250                | 2          | 22                 | 8.37 | 26.8   |
| <i>GsEXPA39</i> | LOC114411409 | 250                | 2          | 20                 | 9.33 | 26.9   |

|                 |              |     |   |      |      |      |
|-----------------|--------------|-----|---|------|------|------|
| <i>GsEXPA40</i> | LOC114414291 | 252 | 2 | 18   | 8.97 | 27.3 |
| <i>GsEXPA41</i> | LOC114414569 | 255 | 2 | 23   | 8.75 | 27.4 |
| <i>GsEXPA42</i> | LOC114415692 | 250 | 2 | 22   | 8.37 | 26.8 |
| <i>GsEXPA43</i> | LOC114416556 | 249 | 2 | 21   | 9.11 | 26.7 |
| <i>GsEXPA44</i> | LOC114416888 | 257 | 2 | 21   | 9.55 | 28.5 |
| <i>GsEXPA45</i> | LOC114417223 | 254 | 2 | 21   | 8.01 | 28.3 |
| <i>GsEXPA46</i> | LOC114418935 | 258 | 2 | 21   | 9.76 | 27.8 |
| <i>GsEXPA47</i> | LOC114419868 | 248 | 2 | 20   | 9.34 | 26.5 |
| <i>GsEXPA48</i> | LOC114422475 | 259 | 1 | 26   | 8.05 | 28.8 |
| <i>GsEXPA49</i> | LOC114424245 | 260 | 2 | 25   | 9.44 | 28.6 |
| <i>GsEXPA50</i> | LOC114425810 | 265 | 3 | None | 9.51 | 29.1 |
| <i>GsEXPB1</i>  | LOC114370793 | 277 | 3 | 29   | 5.43 | 29.5 |
| <i>GsEXPB2</i>  | LOC114375549 | 277 | 3 | 29   | 4.95 | 29.4 |
| <i>GsEXPB3</i>  | LOC114375883 | 258 | 3 | 23   | 9.11 | 28.2 |
| <i>GsEXPB4</i>  | LOC114379096 | 267 | 3 | 31   | 8.66 | 29.1 |
| <i>GsEXPB5</i>  | LOC114401963 | 155 | 2 | 29   | 4.94 | 16.7 |
| <i>GsEXPB6</i>  | LOC114405382 | 267 | 3 | 24   | 5.37 | 28.7 |
| <i>GsEXPB7</i>  | LOC114413024 | 277 | 3 | 29   | 4.87 | 29.5 |
| <i>GsEXPB8</i>  | LOC114417222 | 267 | 3 | 31   | 8.66 | 29.2 |
| <i>GsEXPB9</i>  | LOC114369208 | 272 | 3 | 29   | 7.51 | 29.1 |
| <i>GsEXLA1</i>  | LOC114377455 | 259 | 4 | 19   | 8.28 | 28.0 |
| <i>GsEXLA2</i>  | LOC114378544 | 261 | 4 | 19   | 8.47 | 28.3 |
| <i>GsEXLB1</i>  | LOC114373430 | 272 | 4 | 38   | 5.06 | 29.9 |
| <i>GsEXLB2</i>  | LOC114374907 | 251 | 3 | 25   | 5.51 | 28.2 |
| <i>GsEXLB3</i>  | LOC114392387 | 247 | 3 | 24   | 6.30 | 27.7 |
| <i>GsEXLB4</i>  | LOC114392841 | 251 | 3 | 24   | 5.42 | 27.9 |
| <i>GsEXLB5</i>  | LOC114392916 | 248 | 3 | 24   | 9.16 | 27.4 |
| <i>GsEXLB6</i>  | LOC114392956 | 250 | 3 | 24   | 9.35 | 27.5 |
| <i>GsEXLB7</i>  | LOC114392974 | 251 | 4 | 21   | 4.86 | 27.2 |
| <i>GsEXLB8</i>  | LOC114411512 | 241 | 3 | 24   | 8.78 | 26.8 |
| <i>GsEXLB9</i>  | LOC114412218 | 244 | 3 | 24   | 8.98 | 27.1 |
| <i>GsEXLB10</i> | LOC114412220 | 247 | 3 | 24   | 8.31 | 27.6 |
| <i>GsEXLB11</i> | LOC114412221 | 251 | 3 | 24   | 5.60 | 28.0 |
| <i>GsEXLB12</i> | LOC114412251 | 250 | 4 | 20   | 5.13 | 27.0 |
| <i>GsEXLB13</i> | LOC114423099 | 255 | 4 | 21   | 4.49 | 27.8 |
| <i>GsEXLB14</i> | LOC114423317 | 251 | 3 | 24   | 5.32 | 28.3 |

## Supplementary Table S2

**Table S2.** Primers used in this research

| Name        | Sequence (5'-3')        | Length (bp) | Purpose |
|-------------|-------------------------|-------------|---------|
| GsEXPA2-FW  | AGTGCTCACGCCACCTTCT     | 19          | qRT-PCR |
| GsEXPA2-RV  | ACCACTGCCTGTCGTTTGC     | 19          |         |
| GsEXPA3-FW  | CTTTGATATGGCTGAACCTGC   | 25          | qRT-PCR |
| GsEXPA3-RV  | CCACCCAGTTTTGGACCC      | 18          |         |
| GsEXPA5-FW  | CAGCCCTTCCATCTTCATCA    | 20          | qRT-PCR |
| GsEXPA5-RV  | AAGTGAGGGCGAGGAGGGTT    | 20          |         |
| GsEXPA8-FW  | AGTGCCACGCCACCTTCTA     | 20          | qRT-PCR |
| GsEXPA8-RV  | ACCACTGCCTGTCGTTTGC     | 19          |         |
| GsEXPA14-FW | TCTCAACCTGTTTTCTTCG     | 20          | qRT-PCR |
| GsEXPA14-RV | GGACCAAGTTGAAGTAGGAGTG  | 22          |         |
| GsEXPA26-FW | TGCCTCTGGAACAATGGGTG    | 20          | qRT-PCR |
| GsEXPA26-RV | CTTGCTCGCACTTTATCTCG    | 20          |         |
| GsEXPA33-FW | CCACCTTCTATGGAGGGAGT    | 20          | qRT-PCR |
| GsEXPA33-RV | AATCTCATAGCAAGAGCCACA   | 21          |         |
| GsEXPA36-FW | TGTGGGGAGTGTTACAAAATCA  | 22          | qRT-PCR |
| GsEXPA36-RV | CATCCTCCGTTGTTGTTGG     | 19          |         |
| GsEXPA38-FW | TGCTGACTATGGAGGTGGATG   | 21          | qRT-PCR |
| GsEXPA38-RV | GCAGTGACGATTATGCTACCG   | 21          |         |
| GsEXPA39-FW | GCCTCCCTGGCTCCATTAT     | 19          | qRT-PCR |
| GsEXPA39-RV | CAATGCGAAGGAAGACAGG     | 19          |         |
| GsEXPA42-FW | TGGTTGGCAAGGTGGTCAT     | 19          | qRT-PCR |
| GsEXPA42-RV | GGCAGAAGTTTGTGGCAGTAA   | 21          |         |
| GsEXPA46-FW | CGCCCTTCCGAACGACAAT     | 19          | qRT-PCR |
| GsEXPA46-RV | TATGCGACGGGGACGATTC     | 19          |         |
| GsEXPA50-FW | TGGCTCTTCTTGATTCTTC     | 21          | qRT-PCR |
| GsEXPA50-RV | ACCACAAGCCCCACCCATT     | 19          |         |
| GsEXPB1-FW  | TTGTTTGAATCAGGCGAAGG    | 20          | qRT-PCR |
| GsEXPB1-RV  | TTTGCCAGCATTGCGTAGC     | 19          |         |
| GsEXPB4-FW  | CTCGCCTTGAAACTCGTGC     | 19          | qRT-PCR |
| GsEXPB4-RV  | CGGCTTCACATCCACCATC     | 19          |         |
| GsEXPB7-FW  | GGCAACCCCGTGAAAGTAG     | 19          | qRT-PCR |
| GsEXPB7-RV  | CTCATATTCAACCAAGGTAGCAA | 24          |         |
| GsEXPB8-FW  | TGGGTATGGAACAATGGTGG    | 20          | qRT-PCR |
| GsEXPB8-RV  | CGGGGCACTCATCCGTAAT     | 19          |         |
| GsEXLA1-FW  | GGTTGTGGTGCCTGCTTTC     | 19          | qRT-PCR |
| GsEXLA1-RV  | CAGGCTTCTTGCTTGATTCTT   | 21          |         |
| GsEXLA2-FW  | CAAGGCTTCCTATTTCTCCAA   | 21          | qRT-PCR |
| GsEXLA2-RV  | CACCACAACTGCTCCATCT     | 20          |         |
| GsEXLB2-FW  | CTCTATCTTGGTGGAACCTACG  | 22          | qRT-PCR |
| GsEXLB2-RV  | TGAAACCTCAACTTTATGTCGC  | 22          |         |

|              |                           |    |            |
|--------------|---------------------------|----|------------|
| GsEXLB4-FW   | ATAGCAACCCACCAAACGG       | 19 | qRT-PCR    |
| GsEXLB4-RV   | GTGCCTATCTATTTCTAATCCGTTC | 25 |            |
| GsEXPB1-FW-2 | TTATGGCTCCTACACTTCAACG    | 22 | Gene clone |
| GsEXPB1-RV-2 | AAACAAATGGACAACCTCGATTA   | 23 |            |
